# Supplementary material for: Strong influence of Black Carbon on aerosol optical properties in Central Amazonia during the fire season
Source: Copernicus journal article supplement (doi:10.5194/egusphere-2024-3339), 2024-11-07
Supplement: Supplementary file 1 [file egusphere-2024-3339-supplement.pdf]

## 1 S1 - ACSM collection efficiency

2 The CE found in this study was 0.5, and it is in accordance to other studies in environments dominated by organic aerosols  
3 (Middlebrook et al., 2012; Ng et al., 2011) as well as in other studies in the Amazon (Ponczek et al., 2021; de Sá et al., 2019).  
4 However, it was different from the CE during the wet season in the same site as in our study (CE=1, (Chen et al., 2015), and  
5 from an area highly impacted by local fires (CE = 1, (Brito et al., 2014)). To convert the integrated volume of the SMPS  
6 measurements to mass concentration the density of the compounds was considered 1.78 g cm<sup>-3</sup> for SO<sub>4</sub>, 1.77 g cm<sup>-3</sup> for eBC,  
7 1.72 g cm<sup>-3</sup> for NH<sub>4</sub> and NO<sub>3</sub>, and 1.48 g cm<sup>-3</sup> for the organics (Brito et al., 2014). The mean density of all the PM1 aerosols  
8 measured in our study was 1.54±0.02 g cm<sup>-3</sup> and was multiplied by the total volume estimated from the SMPS measurements  
9 to obtain the integral mass.

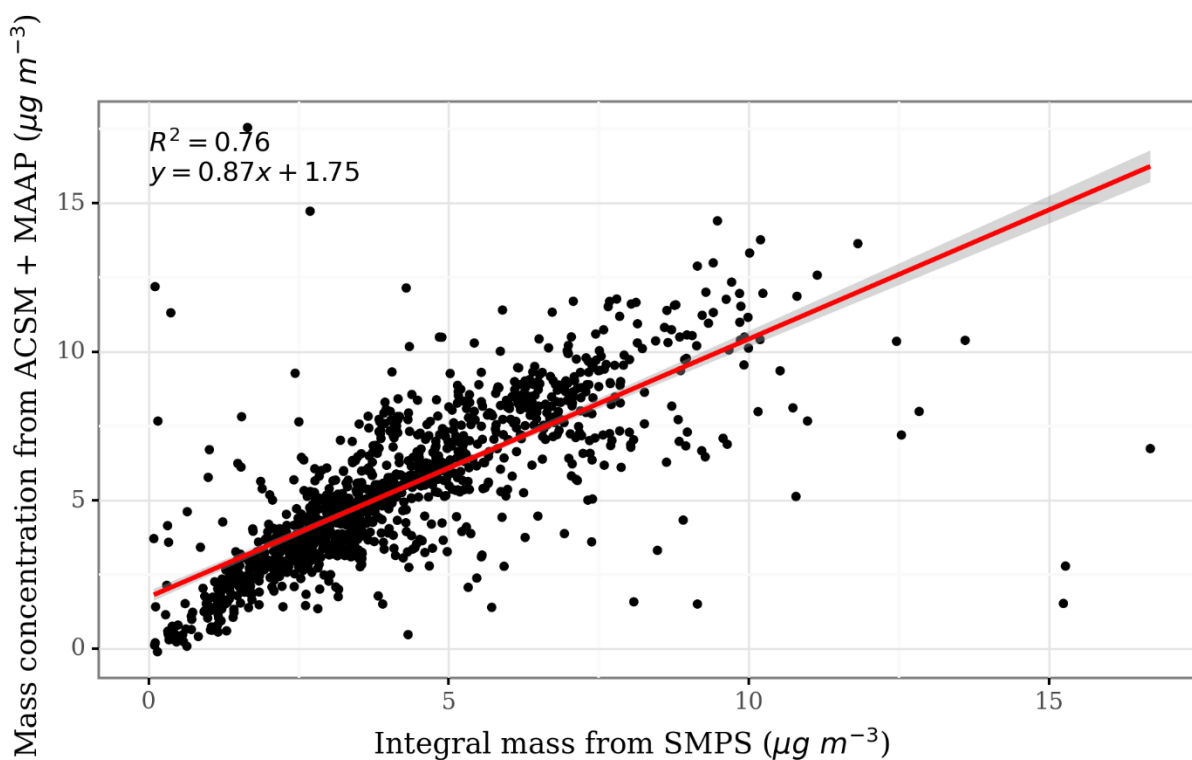

10

11 Figure S1 – Collection efficiency validation combining the mass concentration of non-refractory submicrometer particles  
12 (ACSM) and eBC (MAAP) with the integral mass from the SMPS.

13 **S2 – Generator filter by wind direction**

14 Time series of the fBC, where gray points represent data which passed the filter criteria and was included in the results, and  
15 black points represent the data which was filtered out of the analysis because it was the criteria of either the wind direction  
16 was between 270-340° (for local diesel generator contamination, from our local wind direction measurements) or when the  
17 calculated backtrajectories from the Hysplit model (Draxler and Hess, 1998) passed over Manaus coordinates, as in (Whitehead  
18 et al., 2016). About 17% of the data was filtered out in this process.

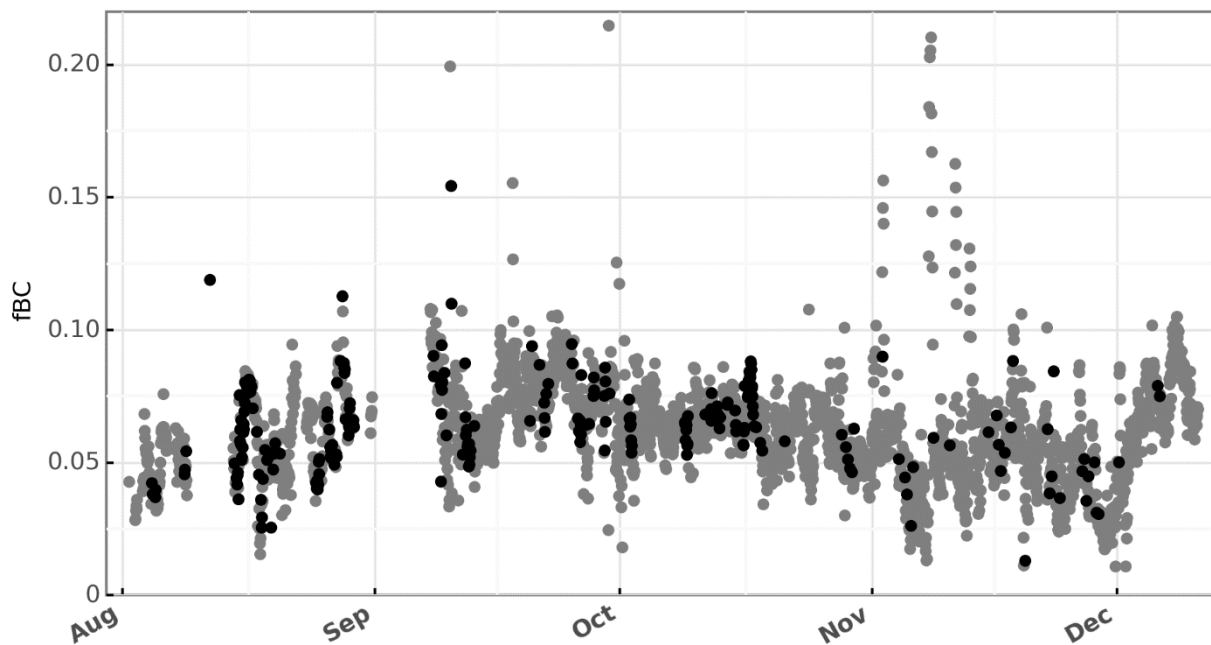

19  
20 Figure S2 – Time series of the fBC, where black dots indicate the data points filtered out due possible contamination from  
21 pollution from Manaus or/and the generator.

22 **S3 - PMF factors**

23 **S3.1 - Signal fractions**

24 Table S3.1 – Comparison of different parameters of validation of the number of PMF factors

| Number of factors | Q/Q expected | fPeak or seed |
|-------------------|--------------|---------------|
| 3                 | 0.31         | -0.2          |
| 4                 | 0.29         | 0             |

25

26 **S3.1.1 - 3 Factors solution**

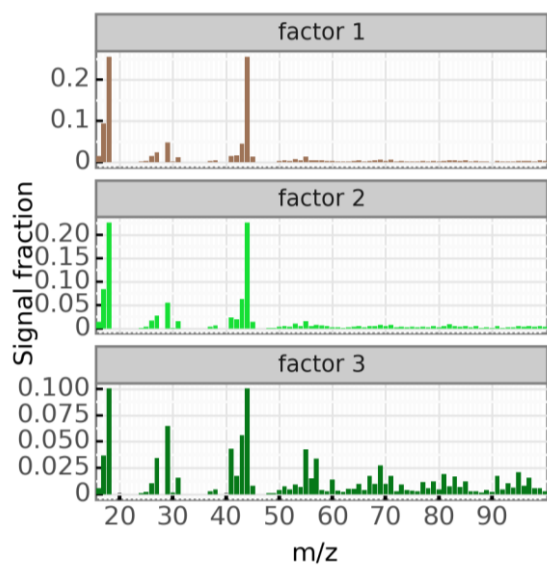

27

28 Figure S3.1 – Signal fractions of the PMF for a 3 factors solution.

29 **S3.1.2 - 4 factors solution**

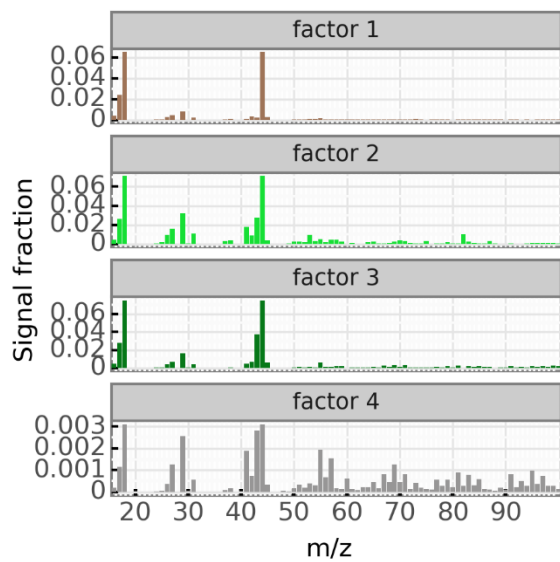

30

31 Figure S3.2 – Signal fractions of the PMF for a 4 factors solution.

32

33 **S3.2 - Pearson`s R**

34 **S3.2.1 - 3 factors**

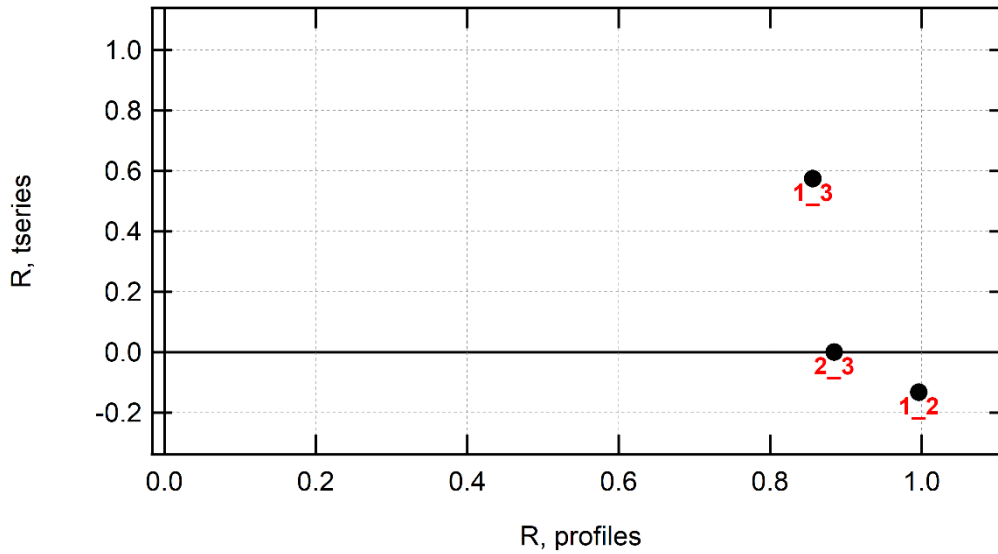

35

36 Figure 3.2.1 – Pearson`s R for the correlations between the time series and the mass spectra of any 2 factors for the PMF  
37 solutions with 3 factors.

38 **S3.2.2 - 4 factors**

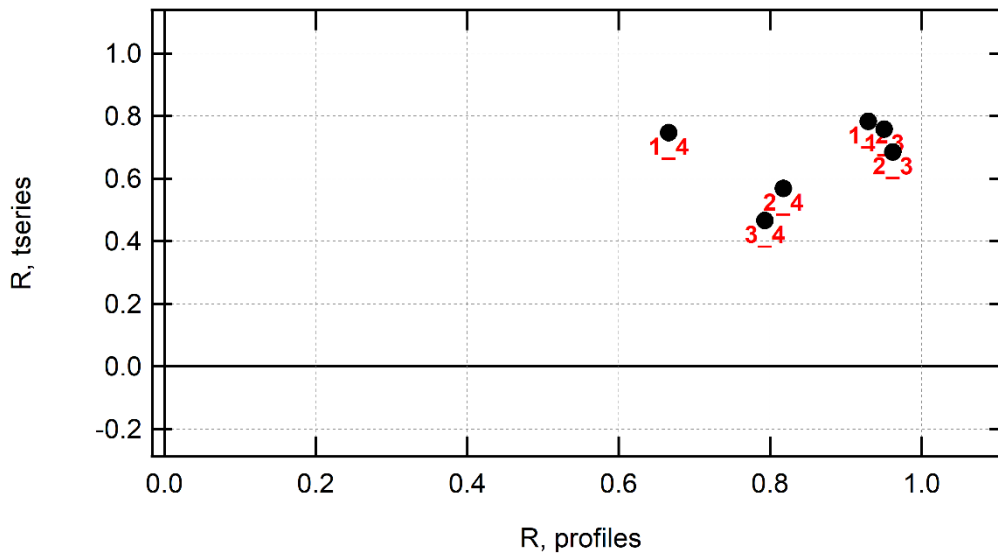

39

40 Figure 3.2.2 – Pearson`s R for the correlations between the time series and the mass spectra of any 2 factors for the PMF  
41 solutions with 4 factors.

42 **S3.3 - Scaled residuals for all m/z's**

43 **S3.3.1 - 3 factors solution**

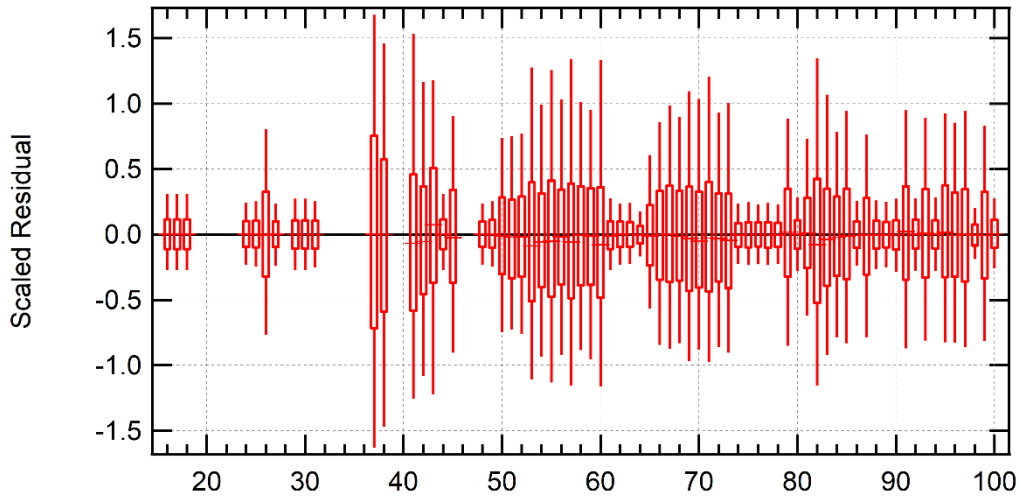

44

45 Figure S3.3.1 – Scaled residuals for the PMF solution with 3 factors.

46 **S3.3.2 - 4 factors solution**

47

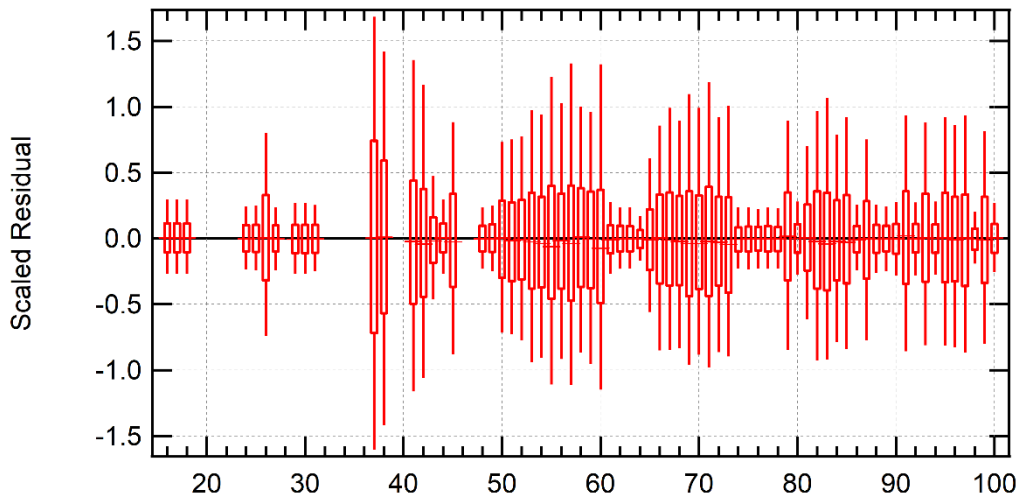

48

49 Figure S3.3.2 – Scaled residuals for the PMF solution with 4 factors.

50

51 S3.4 - Diel cycles

52 S3.4.1 - 3 factors

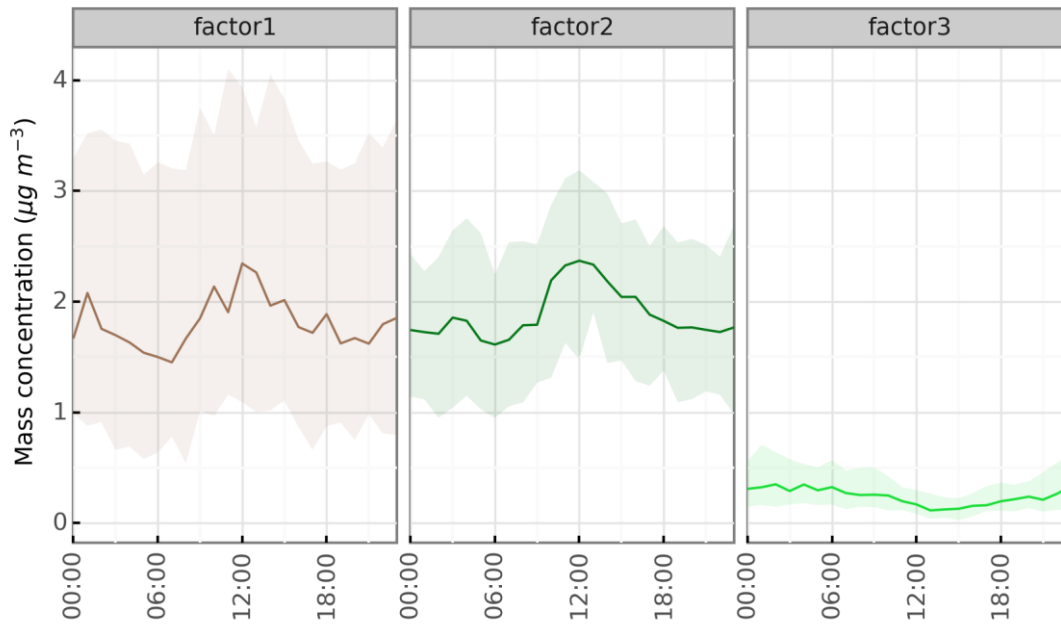

53

54 Figure S3.4.1 – Diel cycles of the different PMF factors for a 3 factors solution.

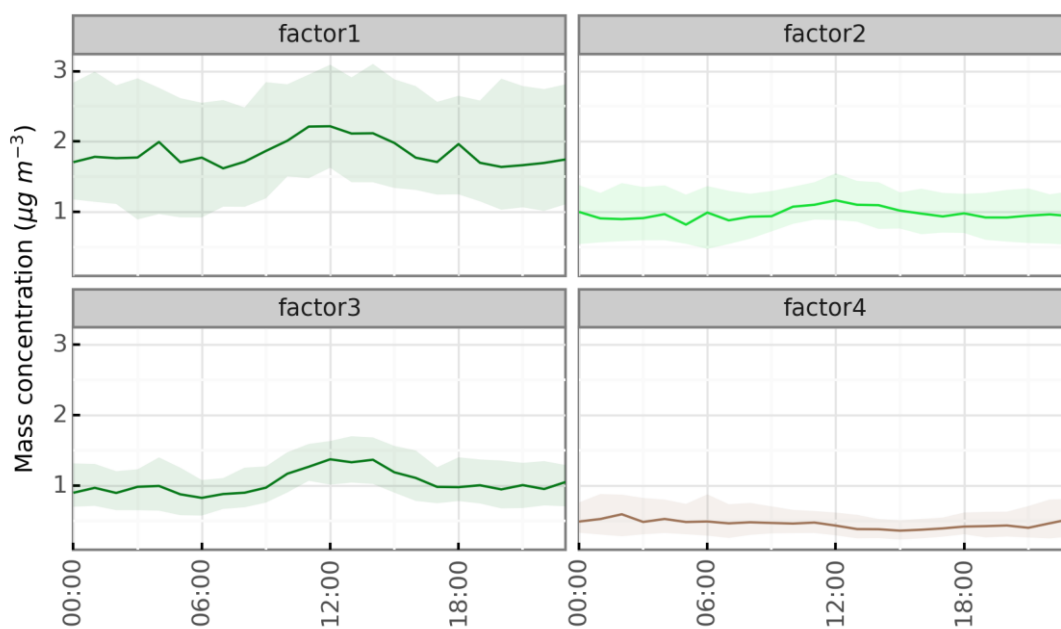

56

57 Figure S3.4.2 – Diel cycles of the different PMF factors for a 4 factors solution.

58 S4 - Correlation matrixes

59 S4.1 - 3 factor solution based on 4 factors solution, with 2 combined:

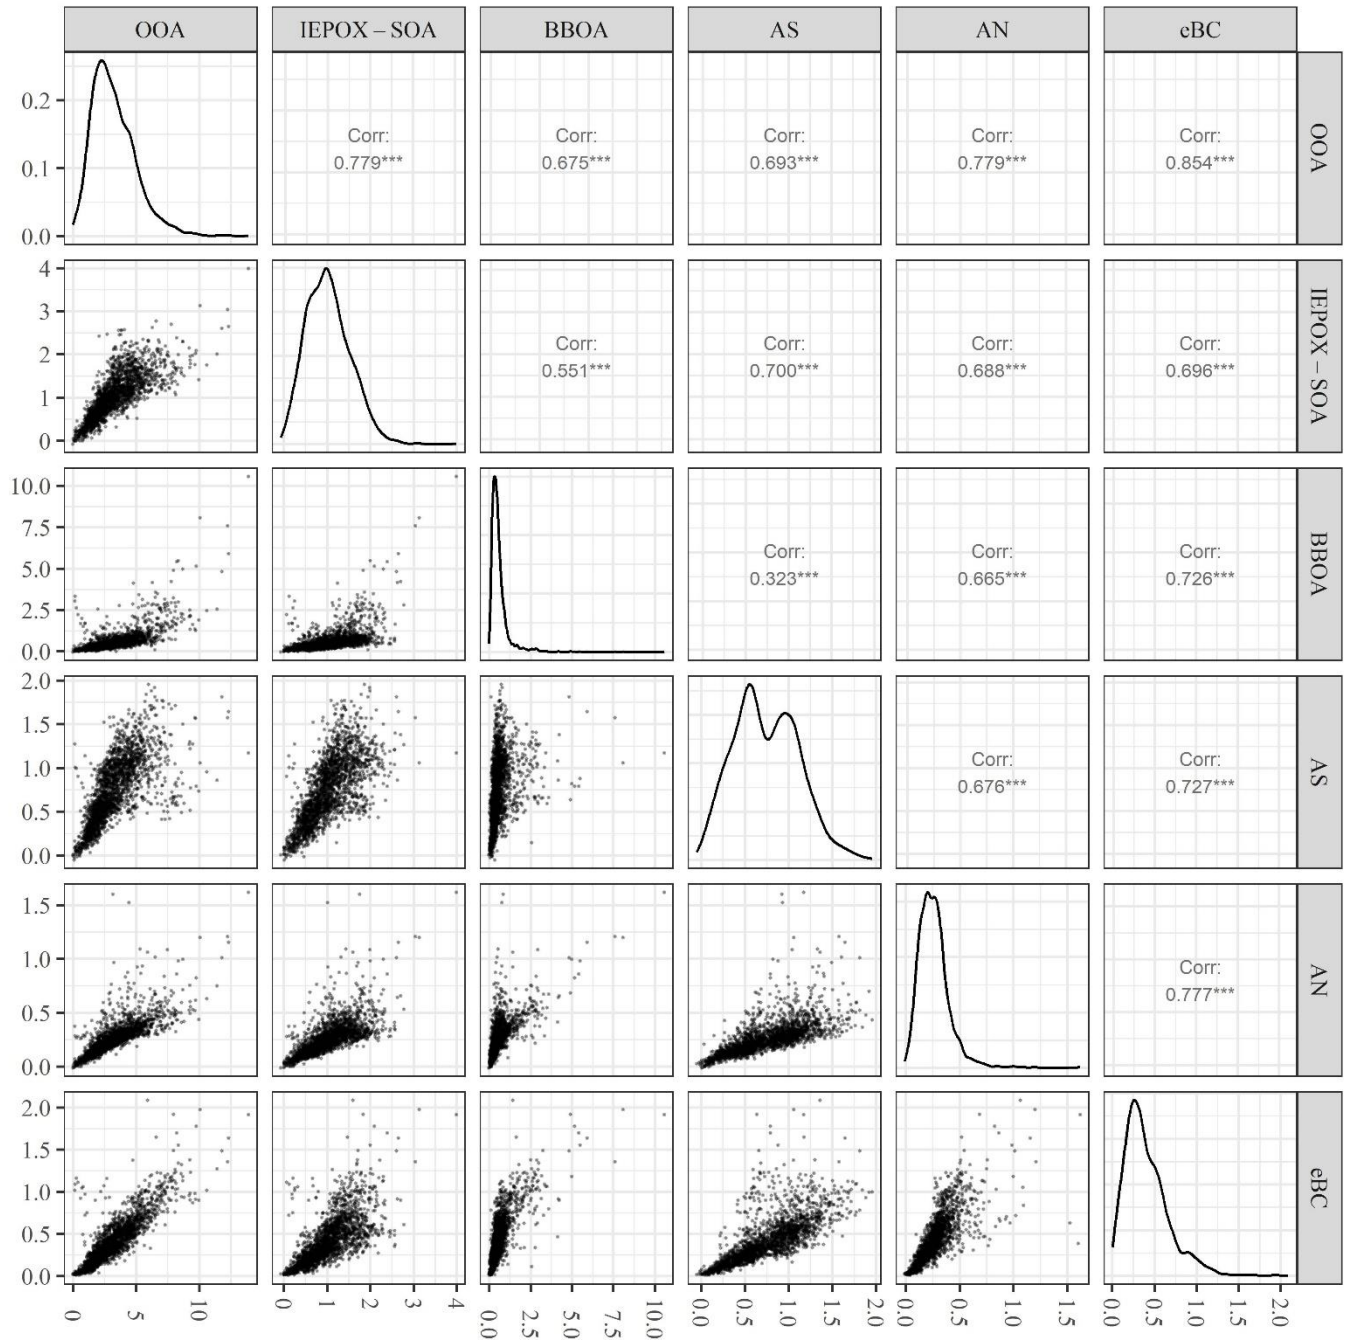



61 Figure S4.1 - Correlation matrix of all the aerosol species for a 3 factor solution based on 4 factors solution, with 2  
 62 combined. The numbers are the Pearson values, and the ‘\*\*\*’ means that  $p < 0.001$ .

63 **S4.2 - 3 factor solution:**

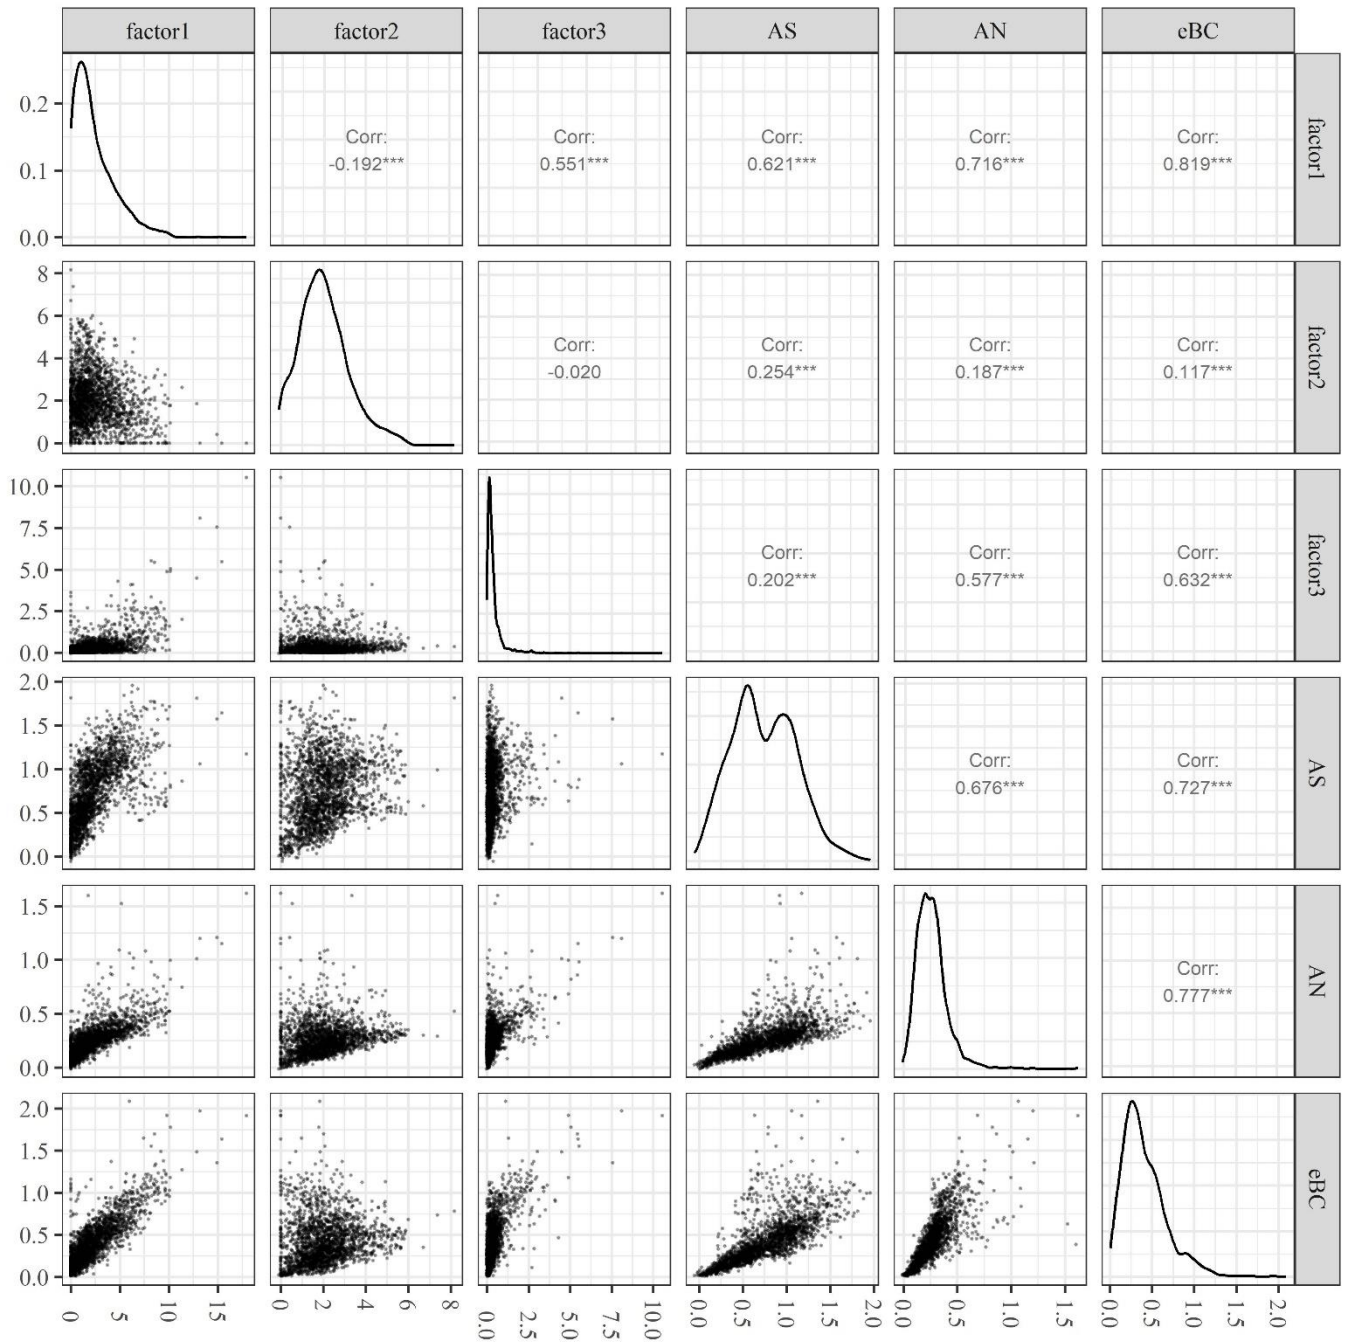

64

65 Figure S4.2 - Correlation matrix of all the aerosol species for a 3 factors solution. The numbers are the Pearson values, and  
 66 the ‘\*\*\*’ means that  $p < 0.001$ .

67 **S4.3 - 4 factor solution, factors 1 and 3 were combined to generate the combined 3 factors solution:**

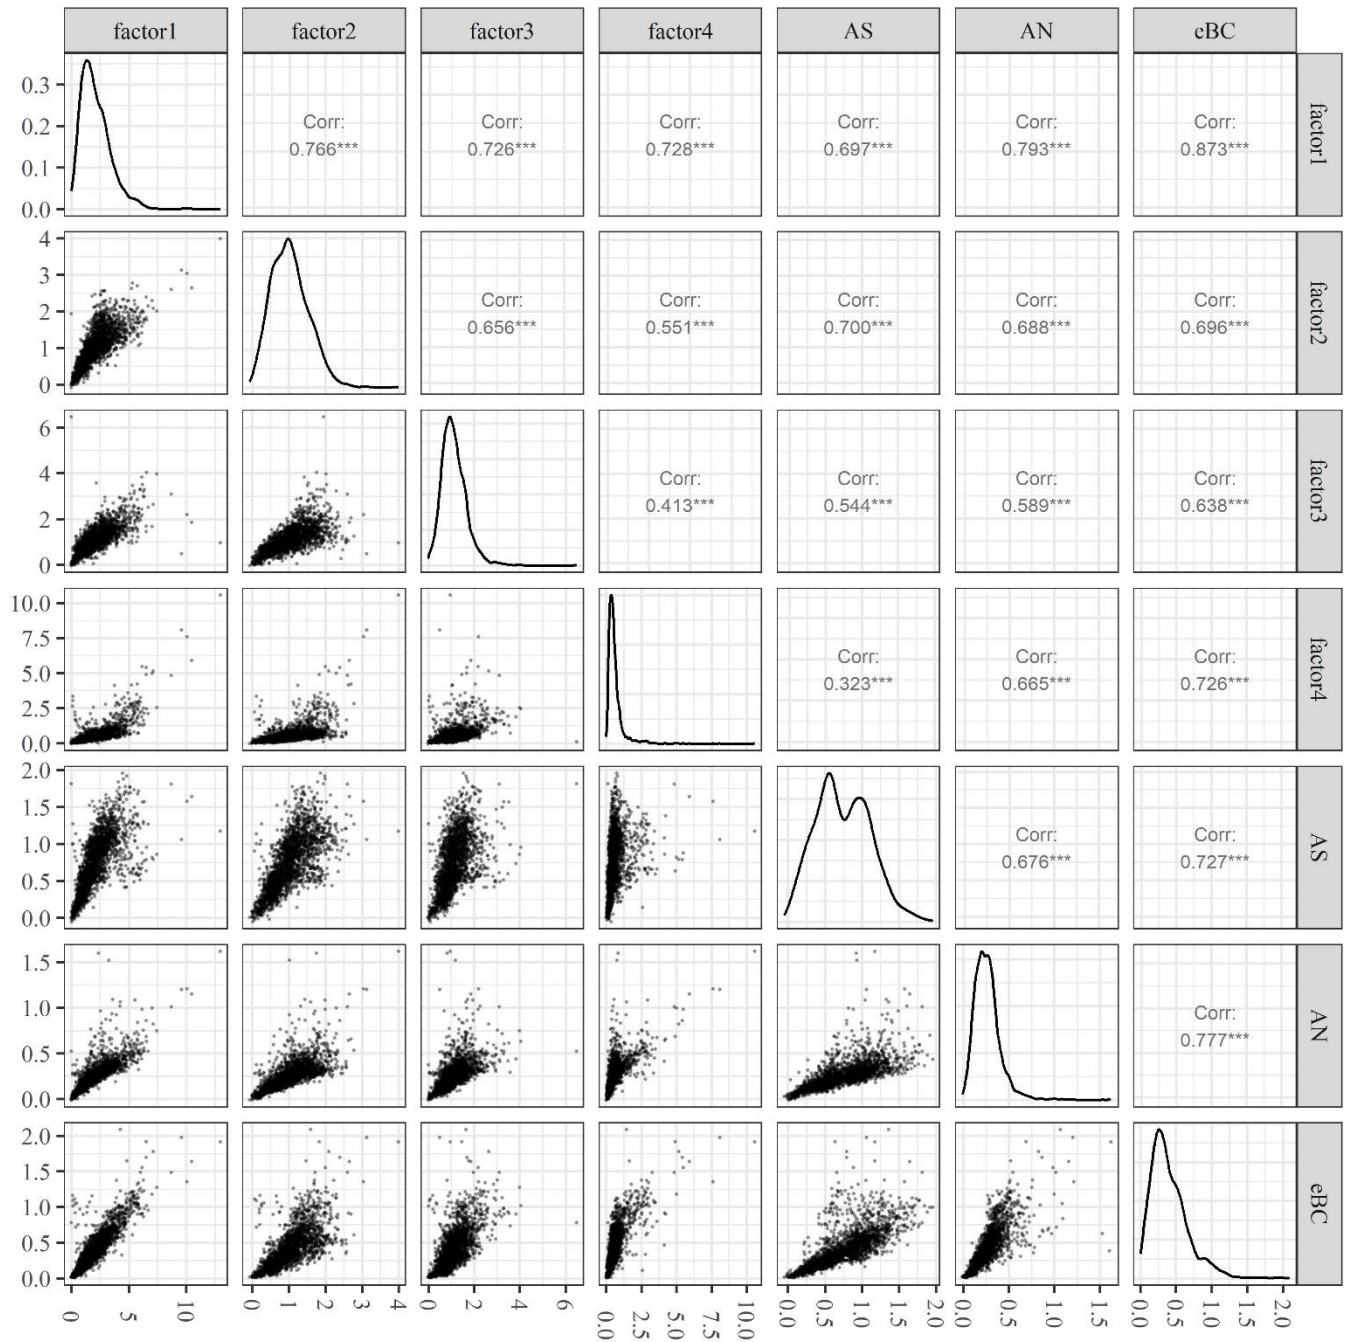

68

69 Figure S4.3 - Correlation matrix of all the aerosol species for a 4 factors solution. The numbers are the Pearson values, and  
 70 the ‘\*\*\*’ means that  $p < 0.001$ .

71

72 **S5 - Multi-linear regression model tests**

73 Table S5.1 - Testing the MLR without AN.

74

|                 | MSE ( $\text{m}^2 \text{g}^{-1}$ ) |            |            |            |           |           |           |           |
|-----------------|------------------------------------|------------|------------|------------|-----------|-----------|-----------|-----------|
| Wavelength (nm) | 450                                | 450 test   | 550        | 550 test   | 637       | 637 test  | 700       | 700 test  |
| eBC             | 13.58±1.08                         | 13.81±1.08 | 10.67±0.70 | 10.84±0.71 | 8.68±0.52 | 8.82±0.53 | 7.62±0.44 | 7.78±0.45 |
| BBOA            | 7.96±0.33                          | 8.49±0.31  | 5.33±0.21  | 5.72±0.20  | 3.83±0.16 | 4.16±0.15 | 3.10±0.13 | 3.40±0.13 |
| IEPOX-SOA       | 5.61±0.41                          | 5.76±0.41  | 3.84±0.27  | 3.95±0.27  | 2.87±0.20 | 2.97±0.20 | 2.37±0.17 | 2.43±0.17 |
| OOA             | 3.58±0.15                          | 3.74±0.15  | 1.94±0.10  | 2.05±0.10  | 1.24±0.07 | 1.34±0.07 | 0.90±0.06 | 0.99±0.06 |
| AS              | 4.79±0.62                          | 5.80±0.60  | 4.79±0.41  | 5.53±0.39  | 4.77±0.30 | 5.41±0.29 | 4.58±0.25 | 5.11±0.25 |
| R <sup>2</sup>  | 0.92                               | 0.92       | 0.93       | 0.93       | 0.93      | 0.93      | 0.93      | 0.92      |

75

76

77 Table S5.2 - Mean of 100 tests using different randomly selected subsets of 50% of the data.

78

|                 | MSE ( $\text{m}^2 \text{g}^{-1}$ ) |            |            |            |           |           |           |           |
|-----------------|------------------------------------|------------|------------|------------|-----------|-----------|-----------|-----------|
| Wavelength (nm) | 450                                | 450 test   | 550        | 550 test   | 637       | 637 test  | 700       | 700 test  |
| eBC             | 13.58±1.08                         | 13.86±2.77 | 10.67±0.70 | 10.85±1.77 | 8.68±0.52 | 8.81±1.28 | 7.62±0.44 | 7.75±1.07 |
| BBOA            | 7.96±0.33                          | 7.90±1.07  | 5.33±0.21  | 5.28±0.74  | 3.83±0.16 | 3.79±0.56 | 3.10±0.13 | 3.07±0.47 |
| IEPOX-SOA       | 5.61±0.41                          | 5.49±0.56  | 3.84±0.27  | 3.76±0.37  | 2.87±0.20 | 2.81±0.27 | 2.37±0.17 | 2.30±0.23 |

|                |           |           |           |           |           |           |           |           |
|----------------|-----------|-----------|-----------|-----------|-----------|-----------|-----------|-----------|
| OOA            | 3.58±0.15 | 3.56±0.31 | 1.94±0.10 | 1.92±0.22 | 1.24±0.07 | 1.23±0.16 | 0.90±0.06 | 0.89±0.14 |
| AS             | 4.79±0.62 | 4.89±1.40 | 4.79±0.41 | 4.87±0.89 | 4.77±0.30 | 4.83±0.64 | 4.58±0.25 | 4.62±0.52 |
| AN             | 7.07±1.41 | 7.14±2.20 | 5.17±0.92 | 5.26±1.51 | 4.41±0.68 | 4.50±1.20 | 3.93±0.58 | 4.01±1.05 |
| R <sup>2</sup> | 0.92      | 0.92±0.01 | 0.93      | 0.93±0.01 | 0.93      | 0.93±0.01 | 0.93      | 0.93±0.01 |

79

80 **S6 – MSE for eBC MAC = 12.3 m<sup>2</sup> g<sup>-1</sup>**

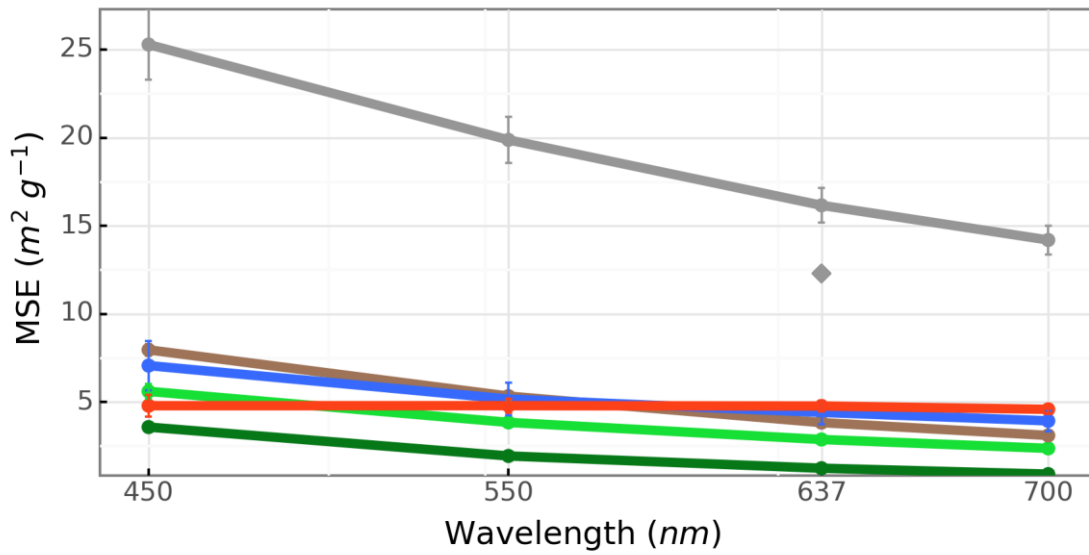

81

82

83 Figure S6 - Mass scattering efficiencies (MSE) for each chemical component at each wavelength, with mass absorption  
 84 cross-section values for eBC = 12.3 m<sup>2</sup> g<sup>-1</sup>.

## 85 References

- 86 Brito, J., Rizzo, L. V., Morgan, W. T., Coe, H., Johnson, B., Haywood, J., Longo, K., Freitas, S., Andreae, M. O. and Artaxo,  
87 P.: Ground-based aerosol characterization during the South American Biomass Burning Analysis (SAMBBA) field  
88 experiment, *Atmos. Chem. Phys.*, 14(22), 12069–12083, doi:10.5194/acp-14-12069-2014, 2014.
- 89 Chen, Q., Farmer, D. K., Rizzo, L. V., Pauliquevis, T., Kuwata, M., Karl, T. G., Guenther, a., Allan, J. D., Coe, H., Andreae,  
90 M. O., Pöschl, U., Jimenez, J. L., Artaxo, P. and Martin, S. T.: Submicron particle mass concentrations and sources in the  
91 Amazonian wet season (AMAZE-08), *Atmos. Chem. Phys.*, 15(7), 3687–3701, doi:10.5194/acp-15-3687-2015, 2015.
- 92 Draxler, R. R. and Hess, G. D.: An overview of the HYSPLIT\_4 modelling system for trajectories, dispersion and deposition,  
93 *Aust. Meteorol. Mag.*, 47(4), 295–308, 1998.
- 94 Middlebrook, A. M., Bahreini, R., Jimenez, J. L. and Canagaratna, M. R.: Evaluation of Composition-Dependent Collection  
95 Efficiencies for the Aerodyne Aerosol Mass Spectrometer using Field Data, *Aerosol Sci. Technol.*, 46(3), 258–271,  
96 doi:10.1080/02786826.2011.620041, 2012.
- 97 Ng, N. L., Herndon, S. C., Trimborn, A., Canagaratna, M. R., Croteau, P. L., Onasch, T. B., Sueper, D., Worsnop, D. R.,  
98 Zhang, Q., Sun, Y. L. and Jayne, J. T.: An Aerosol Chemical Speciation Monitor (ACSM) for routine monitoring of the  
99 composition and mass concentrations of ambient aerosol, *Aerosol Sci. Technol.*, 45(7), 780–794,  
100 doi:10.1080/02786826.2011.560211, 2011.
- 101 Ponczek, M., Franco, M. A., Carbone, S., Rizzo, L. V., Monteiro dos Santos, D., Morais, F. G., Duarte, A., Barbosa, H. M. J.  
102 and Artaxo, P.: Linking the chemical composition and optical properties of biomass burning aerosols in Amazonia, *Environ.*  
103 *Sci. Atmos.*, 2(2), 252–269, doi:10.1039/d1ea00055a, 2021.
- 104 de Sá, S. S., Rizzo, L. V., Palm, B. B., Campuzano-Jost, P., Day, D. A., Yee, L. D., Wernis, R., Isaacman-VanWertz, G., Brito,  
105 J., Carbone, S., Liu, Y. J., Sedlacek, A., Springston, S., Goldstein, A. H., Barbosa, H. M. J., Alexander, M. L., Artaxo, P.,  
106 Jimenez, J. L. and Martin, S. T.: Contributions of biomass-burning, urban, and biogenic emissions to the concentrations and  
107 light-absorbing properties of particulate matter in central Amazonia during the dry season, *Atmos. Chem. Phys.*, 19(12), 7973–  
108 8001, doi:10.5194/acp-19-7973-2019, 2019.
- 109 Whitehead, J. D., Darbyshire, E., Brito, J., Barbosa, H. M. J., Crawford, I., Stern, R., Gallagher, M. W., Kaye, P. H., Allan, J.  
110 D., Coe, H., Artaxo, P. and McFiggans, G.: Biogenic cloud nuclei in the central Amazon during the transition from wet to dry  
111 season, *Atmos. Chem. Phys.*, 16(15), 9727–9743, doi:10.5194/acp-16-9727-2016, 2016.

112
